# Supplementary material for: Profiling Cancer-Associated Fibroblasts in Melanoma
Source: MDPI journal article supplement (doi:10.3390/ijms22147255), 2021-07-06
Supplement: s1 [file s1]

**Suppl Table S1. Features of melanomas**

| Tissue Sample | Cells      | Stage | Age | Anatomic region  |
|---------------|------------|-------|-----|------------------|
| Melanoma12    | CAF        | pT2b  | 56  | Gluteus          |
| Melanoma13    | Mel13      | pT3b  | 62  | Leg              |
| Melanoma16    | Mel16      | pT4b  | 46  | Abdomen          |
| Melanoma56    | CAF, Mel56 | pT4b  | 48  | Shoulder         |
| Melanoma75    | CAF        | pT4b  | 89  | Shoulder         |
| Melanoma77    | CAF, Mel77 | pT4b  | 71  | Shoulder         |
| Melanoma85    | CAF        | pT4b  | 89  | Arm              |
| Melanoma101   | CAF        | pT4b  | 82  | Arm              |
| Melanoma103   | CAF        | pT4a  | 71  | Arm              |
| Melanoma104   | CAF        | pTx   | 65  | Occipital region |

Suppl Table S2. Primers for Real Time Quantitative Polymerase Chain Reaction

| Target Gene | Foward Primer                    | Reverse primer                  |
|-------------|----------------------------------|---------------------------------|
| βactin      | 5'-GACAGGATGCAGAAGGAGATTACT-3'   | 5'-TGATCCACATCTGCTGGAAGGT-3'    |
| α-SMA       | 5'-GCAGCCCAGCCAAGCACTG-T-3'      | 5'-TGGGAGCATCGTCCCCAGCA-3'      |
| COLL11      | 5'-AGCACAGACGGAGATAAATGGC-3'     | 5'-CGACAAGCATACCAGGCTCA-3'      |
| CXCL10      | 5'-AGCAGAGGAACCTCCAGTCT-3'       | 5'-AGGTACTCCTTGAATGCCACT-3'     |
| CXCL12      | 5'-GCCCTTCAGATTGTAGCCCG-3'       | 5'-AGTCCTTTTTGGCTGTTGTGC-3'     |
| b-FGF       | 5'-CTGGCTTCTAAATGTGTTACGGA-3'    | 5'-GCCCAGGTCTGTTTTGGAT-3'       |
| FAP         | 5'-GGCTTATCACCTGATCGGCAA-3'      | 5'-ACAAATTCTCCATTGCTAAGGTCA-3'  |
| Fibronectin | 5'-CCTCGAAGAGCAAGAGGCAG-3'       | GCTTCAGGTTTACTCTCGCA-3'         |
| FSP1        | 5'-CTTGGTTTGGTGCTTCTGAGAT-3'     | 5'-TGGACACCATCACATCCAGG-3'      |
| Glut1       | 5'-TGGCATCAACGCTGTCTTCT-3'       | 5'-AGCCAATGGTGGCATAACA-3'       |
| Glut3       | 5'- CGAACTTCCTAGTCGGATTG-3'      | 5'-AGGAGGCACGACTTAGACAT-3'      |
| Hexo2       | 5'-CCTCGGTTTCCCAACTCTGC-3'       | 5'-GGTCAACCTTRCTGCACTTGG-3'     |
| HGF         | 5'-CGCTGACAATACTATGAATGACAC-3'   | 5'-GCTCGTGAGGATACTGAGAATC-3'    |
| HMGCα       | 5'-TACCACCAATGCCTGCTACG-3'       | 5'-TGGCATAACGACCATCCCAG-3'      |
| IGF         | 5'-TCAGCAGTCTTCAA-3'             | 5'-CACAGCGCCAGGTAG-3'           |
| IL1α        | 5'-CGCCAATGACTCAGAGGAAGA-3'      | 5'-AGGGCGTCATTCAGGATGAA-3'      |
| IL1β        | 5'-CTGAGCTCGCCAGTGAAATG-3'       | 5'-TTTAGGGCCATCAGCTTCAAA-3'     |
| IL6         | 5'-AGCCACTCACCTCTTCAGAACG-3'     | 5'-GGTTCAGGTTGTTTTCTGCCAG-3'    |
| IL8         | 5'-CTTGGCAGCCTTCCTGATTTT-3'      | 5'-TTCTGTGTTGGCGCAGTGTG-3'      |
| MFAP5       | 5'-TTCCACAGATGACTTGGCCTC-3'      | 5'-CGATGCACAGAGTAGAGCCTT-3'     |
| MMP1        | 5'-CTGGCCACAAC TGCCAAATG-3'      | 5'-CTGTCCCTGAACAGCCCAGTACTTA-3' |
| MMP2        | 5'-TCTCCTGACATTGACCTTGGC-3'      | 5'-CAAGGTGCTGGCTGAGTAGATC-3'    |
| MMP9        | 5'-GACGATGACGAGTTGTGGTCC-3'      | 5'-GGCCCTCGAAGATGAAGGGG-3'      |
| NKG2D       | 5'-TCCCTCTCTGAGCAGGAATC-3'       | 5'-CCACGAATCCACCCCATCAA-3'      |
| PDGFRα      | 5'-GTGTGGGACATTATTGCGG-3'        | 5'-TAGGCTCAGCCCTGTGAGAA-3'      |
| PDGFRβ      | 5'-GGAGAGGGCAGTAAGGAGGA-3'       | 5'-GAAGCCGCATGGTGCCT TG-3'      |
| PDL1        | 5'-TGCAGGGCATTCCAGAAAGA-3'       | 5'-ACCGTGACAGTAAATGCGTTC-3'     |
| PDL2        | 5'-AGGGAAGTGAACAGTGCTATCTG-3'    | 5'-CTGCAGGCCACCGAATTCTT-3'      |
| PTGIS       | 5'-TATCCTTTGGCAAGCGGAGC-3'       | 5'-TCAGCACGCTATCAAGCACA-3'      |
| SCF         | 5'-AAGAGGATAATGAGATAAGTATGTTG-3' | 5'-TTACCAGCCAATGTACGAAAGT3'     |
| TGFβ        | 5'-GCCCTGGACACCAACTATTG-3'       | 5'-CGTGTCCAGGCTCCAATG3'         |
| TIMP2       | 5'-GTTTATCTACACGGCCCCCT-3'       | 5'-TCGGCCTTTCCTGCAATGAG-3'      |
| VEGF        | 5'-GTTGACCTTCTCCATCC-3'          | 5'-TTCTCTGCCTCCACAATG-3'        |
